# Supplementary material for: Broadband yellow and white emission from large octahedral tilting in (110)-oriented layered perovskites: imidazolium-methylhydrazinium lead halides
Source: Royal Society of Chemistry journal article supplement (doi:10.1039/d3tc00401e), 2023-01-01
Supplement: d3tc00401e1.pdf [file d3tc00401e1.pdf]

Electronic Supporting Information for:

# **Broadband Yellow and White Emission from Large Octahedral Tilting in (110)-Oriented Layered Perovskites: Imidazolium-Methylhydrazinium Lead Halides**

Authors: Dawid Drozdowski,<sup>\*,a</sup> Katarzyna Fedoruk,<sup>b</sup> Adam Kabański,<sup>a</sup> Adam Sieradzki,<sup>b</sup>

Mirosław Mączka<sup>a</sup> and Anna Gągor<sup>\*,a</sup>

<sup>a</sup>*Institute of Low Temperature and Structure Research, Polish Academy of Sciences, ul. Okólna 2, 50-422 Wrocław, Poland*

<sup>b</sup>*Department of Experimental Physics, Wrocław University of Science and Technology, Wybrzeże Wyspiańskiego 27, 50-370 Wrocław, Poland*

\* - Corresponding Authors; e-mails: d.drozdowski@intibs.pl, a.gagor@intibs.pl

**Table S1.** Experimental and refinement details of IMMHyPbBr<sub>4</sub> (IMPB,  $M_r = 643.01$ ).

|                                                                            | <b>Phase I, 358 K</b>              | <b>Phase II, 295 K</b>              | <b>Phase II, 100 K</b>             |
|----------------------------------------------------------------------------|------------------------------------|-------------------------------------|------------------------------------|
| <b>Crystal data</b>                                                        |                                    |                                     |                                    |
| Crystal system, space group                                                | Monoclinic, $P2/c$                 | Monoclinic, $P2_1/c$                | Monoclinic, $P2_1/c$               |
| Temperature (K)                                                            | 358                                | 295                                 | 100                                |
| $a, b, c$ (Å)                                                              | 6.0384 (4), 13.970 (1), 8.5113 (6) | 5.9753 (7), 28.414 (4), 8.2762 (12) | 5.9431 (2), 28.182 (1), 8.1723 (4) |
| $\beta$ (°)                                                                | 92.06 (1)                          | 90.49 (1)                           | 91.129 (3)                         |
| $V$ (Å <sup>3</sup> )                                                      | 717.53 (8)                         | 1405.1 (3)                          | 1368.5 (1)                         |
| $Z$                                                                        | 2                                  | 4                                   | 4                                  |
| $\mu$ (mm <sup>-1</sup> )                                                  | 22.86                              | 23.35                               | 24.12                              |
| Crystal size (mm)                                                          | 0.2 × 0.14 × 0.07                  | 0.2 × 0.14 × 0.07                   | 0.35 × 0.17 × 0.11                 |
| <b>Data collection</b>                                                     |                                    |                                     |                                    |
| $T_{\min}, T_{\max}$                                                       | 0.106, 1.000                       | 0.280, 1.000                        | 0.219, 1.000                       |
| No. of measured, independent and observed [ $I > 2\sigma(I)$ ] reflections | 4566, 1480, 1198                   | 6467, 2846, 2188                    | 13903, 2798, 2594                  |
| $R_{\text{int}}$                                                           | 0.032                              | 0.042                               | 0.048                              |
| $(\sin \theta/\lambda)_{\text{max}}$ (Å <sup>-1</sup> )                    | 0.625                              | 0.625                               | 0.625                              |
| <b>Refinement</b>                                                          |                                    |                                     |                                    |
| $R[F^2 > 2\sigma(F^2)], wR(F^2), S$                                        | 0.044, 0.115, 1.02                 | 0.057, 0.124, 1.09                  | 0.039, 0.090, 1.17                 |
| No. of reflections                                                         | 1480                               | 2846                                | 2798                               |
| No. of parameters                                                          | 59                                 | 114                                 | 84                                 |
| No. of restraints                                                          | 9                                  | 0                                   | 6                                  |
| $\Delta\rho_{\text{max}}, \Delta\rho_{\text{min}}$ (e Å <sup>-3</sup> )    | 1.89, -1.56                        | 1.59, -2.39                         | 2.36, -2.75                        |

**Table S2.** Experimental and refinement details of IMMHyPbCl<sub>4</sub> (IMPC,  $M_r = 465.17$ )

|                                                                            | <b>Phase I, 390 K</b>              | <b>Phase II, 295 K</b>             | <b>Phase II, 100 K</b>             |
|----------------------------------------------------------------------------|------------------------------------|------------------------------------|------------------------------------|
| <b>Crystal data</b>                                                        |                                    |                                    |                                    |
| Crystal system, space group                                                | Monoclinic, $P2/c$                 | Monoclinic, $P2_1/c$               | Monoclinic, $P2_1/c$               |
| Temperature (K)                                                            | 390                                | 295                                | 100                                |
| $a, b, c$ (Å)                                                              | 5.7615 (4), 13.725 (1), 8.1876 (9) | 5.7168 (2), 27.883 (1), 8.0079 (3) | 5.6652 (2), 27.388 (2), 7.9492 (4) |
| $\beta$ (°)                                                                | 90.47 (1)                          | 90.132 (3)                         | 90.453 (4)                         |
| $V$ (Å <sup>3</sup> )                                                      | 647.4 (1)                          | 1276.45 (8)                        | 1233.3 (1)                         |
| $Z$                                                                        | 2                                  | 4                                  | 4                                  |
| $\mu$ (mm <sup>-1</sup> )                                                  | 13.82                              | 14.02                              | 14.51                              |
| Crystal size (mm)                                                          | 0.15 × 0.11 × 0.02                 | 0.15 × 0.11 × 0.02                 | 0.24 × 0.12 × 0.04                 |
| <b>Data collection</b>                                                     |                                    |                                    |                                    |
| $T_{\min}, T_{\max}$                                                       | 0.145, 1.000                       | 0.362, 1.000                       | 0.201, 1.000                       |
| No. of measured, independent and observed [ $I > 2\sigma(I)$ ] reflections | 2397, 1093, 874                    | 25547, 2585, 2380                  | 13157, 2508, 2351                  |
| $R_{\text{int}}$                                                           | 0.046                              | 0.038                              | 0.034                              |
| $(\sin \theta/\lambda)_{\text{max}}$ (Å <sup>-1</sup> )                    | 0.609                              | 0.625                              | 0.625                              |
| <b>Refinement</b>                                                          |                                    |                                    |                                    |
| $R[F^2 > 2\sigma(F^2)], wR(F^2), S$                                        | 0.047, 0.112, 1.04                 | 0.029, 0.062, 1.24                 | 0.029, 0.071, 1.16                 |
| No. of reflections                                                         | 1093                               | 2585                               | 2508                               |
| No. of parameters                                                          | 59                                 | 114                                | 120                                |
| No. of restraints                                                          | 9                                  | 0                                  | 0                                  |
| $\Delta\rho_{\text{max}}, \Delta\rho_{\text{min}}$ (e Å <sup>-3</sup> )    | 0.83, -1.16                        | 1.24, -2.04                        | 1.30, -1.78                        |

**Table S3.** Selected geometric parameters of IMPB (Å, °)

| <b>Phase I, 358 K</b>                    |             |                                           |             |
|------------------------------------------|-------------|-------------------------------------------|-------------|
| Pb1—Br1                                  | 3.0198 (2)  | Pb1—Br2                                   | 3.108 (7)   |
| Pb1—Br1 <sup>i</sup>                     | 3.0198 (2)  | Pb1—Br2 <sup>iii</sup>                    | 3.110 (7)   |
| Pb1—Br3                                  | 2.8983 (12) | Pb1—Br2 <sup>ii</sup>                     | 3.108 (7)   |
| Pb1—Br3 <sup>ii</sup>                    | 2.8983 (12) | Pb1—Br2 <sup>iv</sup>                     | 3.110 (7)   |
| Br1—Pb1—Br1 <sup>i</sup>                 | 177.78 (8)  | Br3—Pb1—Br3 <sup>ii</sup>                 | 92.20 (8)   |
| Br1—Pb1—Br2 <sup>iii</sup>               | 87.77 (17)  | Br3—Pb1—Br2 <sup>iii</sup>                | 94.85 (17)  |
| Br1—Pb1—Br2 <sup>iv</sup>                | 93.95 (17)  | Br3 <sup>ii</sup> —Pb1—Br2 <sup>iv</sup>  | 94.85 (17)  |
| Br1—Pb1—Br2 <sup>ii</sup>                | 84.81 (17)  | Br3 <sup>ii</sup> —Pb1—Br2 <sup>ii</sup>  | 85.96 (17)  |
| Br1 <sup>i</sup> —Pb1—Br2 <sup>iii</sup> | 93.96 (17)  | Br3 <sup>ii</sup> —Pb1—Br2 <sup>iii</sup> | 172.37 (11) |
| Br1 <sup>i</sup> —Pb1—Br2 <sup>ii</sup>  | 96.67 (17)  | Br3—Pb1—Br2 <sup>ii</sup>                 | 173.57 (13) |
| Br1 <sup>i</sup> —Pb1—Br2 <sup>iv</sup>  | 87.77 (17)  | Br3 <sup>ii</sup> —Pb1—Br2                | 173.57 (13) |
| Br1—Pb1—Br2                              | 96.67 (17)  | Br3—Pb1—Br2                               | 85.96 (17)  |
| Br1 <sup>i</sup> —Pb1—Br2                | 84.81 (17)  | Br3—Pb1—Br2 <sup>iv</sup>                 | 172.37 (11) |
| Br3 <sup>ii</sup> —Pb1—Br1               | 89.45 (5)   | Br2—Pb1—Br2 <sup>iii</sup>                | 12.71 (13)  |
| Br3 <sup>ii</sup> —Pb1—Br1 <sup>i</sup>  | 89.01 (5)   | Br2 <sup>ii</sup> —Pb1—Br2 <sup>iii</sup> | 86.72 (4)   |
| Br3—Pb1—Br1                              | 89.01 (5)   | Br2—Pb1—Br2 <sup>iv</sup>                 | 86.72 (4)   |
| Br3—Pb1—Br1 <sup>i</sup>                 | 89.45 (5)   |                                           |             |
| <b>Phase II, 295 K</b>                   |             |                                           |             |
| Pb1—Br1                                  | 2.9821 (16) | Pb1—Br3                                   | 3.0134 (16) |
| Pb1—Br2                                  | 2.8697 (16) | Pb1—Br4                                   | 2.9909 (15) |
| Pb1—Br3 <sup>v</sup>                     | 3.1661 (17) | Pb1—Br4 <sup>vi</sup>                     | 2.9972 (15) |
| Br1—Pb1—Br3                              | 179.03 (5)  | Br2—Pb1—Br4 <sup>vi</sup>                 | 87.24 (5)   |
| Br1—Pb1—Br3 <sup>v</sup>                 | 94.22 (5)   | Br3—Pb1—Br3 <sup>v</sup>                  | 86.621 (19) |
| Br1—Pb1—Br4                              | 87.33 (5)   | Br4—Pb1—Br3 <sup>v</sup>                  | 93.11 (5)   |
| Br1—Pb1—Br4 <sup>vi</sup>                | 89.03 (6)   | Br4 <sup>vi</sup> —Pb1—Br3                | 91.40 (6)   |
| Br2—Pb1—Br1                              | 91.30 (5)   | Br4 <sup>vi</sup> —Pb1—Br3 <sup>v</sup>   | 93.69 (5)   |
| Br2—Pb1—Br3                              | 87.86 (5)   | Br4—Pb1—Br3                               | 92.13 (6)   |
| Br2—Pb1—Br3 <sup>v</sup>                 | 174.42 (5)  | Br4—Pb1—Br4 <sup>vi</sup>                 | 172.51 (7)  |
| Br2—Pb1—Br4                              | 86.30 (5)   | Pb1—Br3—Pb1 <sup>vii</sup>                | 157.79 (7)  |
| <b>Phase II, 100 K</b>                   |             |                                           |             |
| Pb1—Br1                                  | 3.0056 (10) | Pb1—Br3                                   | 2.9764 (10) |
| Pb1—Br2                                  | 2.8469 (10) | Pb1—Br4 <sup>vi</sup>                     | 3.0449 (10) |
| Pb1—Br3 <sup>v</sup>                     | 3.2135 (10) | Pb1—Br4                                   | 2.9500 (10) |
| Br1—Pb1—Br3 <sup>v</sup>                 | 93.91 (3)   | Br3—Pb1—Br4 <sup>vi</sup>                 | 98.38 (3)   |
| Br1—Pb1—Br4 <sup>vi</sup>                | 85.00 (3)   | Br4—Pb1—Br1                               | 84.02 (3)   |
| Br2—Pb1—Br1                              | 91.25 (3)   | Br4—Pb1—Br3 <sup>v</sup>                  | 91.25 (3)   |
| Br2—Pb1—Br3                              | 86.75 (3)   | Br4—Pb1—Br3                               | 92.23 (3)   |
| Br2—Pb1—Br3 <sup>v</sup>                 | 173.40 (3)  | Br4 <sup>vi</sup> —Pb1—Br3 <sup>v</sup>   | 99.79 (3)   |

|                           |             |                             |            |
|---------------------------|-------------|-----------------------------|------------|
| Br2—Pb1—Br4               | 85.20 (3)   | Br4—Pb1—Br4 <sup>vi</sup>   | 164.92 (4) |
| Br2—Pb1—Br4 <sup>vi</sup> | 84.74 (3)   | Pb1—Br3—Pb1 <sup>vii</sup>  | 147.54 (4) |
| Br3—Pb1—Br1               | 175.89 (3)  | Pb1—Br4—Pb1 <sup>viii</sup> | 164.92 (4) |
| Br3—Pb1—Br3 <sup>v</sup>  | 87.839 (14) |                             |            |

Symmetry code(s): (i)  $x-1, y, z$ ; (ii)  $-x, y, -z+1/2$ ; (iii)  $-x, -y+1, -z+1$ ; (iv)  $x, -y+1, z-1/2$ ; (v)  $x, -y+1/2, z+1/2$ ; (vi)  $x+1, y, z$ ; (vii)  $x, -y+1/2, z-1/2$ , (viii)  $x-1, y, z$ .

**Table S4.** Selected geometric parameters of IMPC (Å, °)

| <b>Phase I, 390 K</b>                    |             |                                           |             |
|------------------------------------------|-------------|-------------------------------------------|-------------|
| Pb1—Cl1                                  | 2.8844 (4)  | Pb1—Cl2 <sup>iii</sup>                    | 2.98 (4)    |
| Pb1—Cl1 <sup>i</sup>                     | 2.8844 (4)  | Pb1—Cl2 <sup>ii</sup>                     | 2.99 (4)    |
| Pb1—Cl3                                  | 2.755 (4)   | Pb1—Cl2 <sup>iv</sup>                     | 2.98 (4)    |
| Pb1—Cl3 <sup>ii</sup>                    | 2.755 (4)   | Pb1—Cl2                                   | 2.99 (4)    |
| Br1—Pb1—Br1 <sup>i</sup>                 | 177.78 (8)  | Br3 <sup>ii</sup> —Pb1—Br2 <sup>iv</sup>  | 94.85 (17)  |
| Br1—Pb1—Br2 <sup>iii</sup>               | 87.77 (17)  | Br3 <sup>ii</sup> —Pb1—Br2 <sup>ii</sup>  | 85.96 (17)  |
| Br1—Pb1—Br2 <sup>iv</sup>                | 93.95 (17)  | Br3 <sup>ii</sup> —Pb1—Br2 <sup>iii</sup> | 172.37 (11) |
| Br1—Pb1—Br2 <sup>ii</sup>                | 84.81 (17)  | Br3—Pb1—Br2 <sup>ii</sup>                 | 173.57 (13) |
| Br1 <sup>i</sup> —Pb1—Br2 <sup>iii</sup> | 93.96 (17)  | Br3 <sup>ii</sup> —Pb1—Br2                | 173.57 (13) |
| Br1 <sup>i</sup> —Pb1—Br2 <sup>ii</sup>  | 96.67 (17)  | Br3—Pb1—Br2                               | 85.96 (17)  |
| Br1 <sup>i</sup> —Pb1—Br2 <sup>iv</sup>  | 87.77 (17)  | Br3—Pb1—Br2 <sup>iv</sup>                 | 172.37 (11) |
| Br1—Pb1—Br2                              | 96.67 (17)  | Br2—Pb1—Br2 <sup>iii</sup>                | 12.71 (13)  |
| Br1 <sup>i</sup> —Pb1—Br2                | 84.81 (17)  | Br2 <sup>ii</sup> —Pb1—Br2 <sup>iii</sup> | 86.72 (4)   |
| Br3 <sup>ii</sup> —Pb1—Br1               | 89.45 (5)   | Br2—Pb1—Br2 <sup>iv</sup>                 | 86.72 (4)   |
| Br3 <sup>ii</sup> —Pb1—Br1 <sup>i</sup>  | 89.01 (5)   | Br2 <sup>iii</sup> —Pb1—Br2 <sup>iv</sup> | 78.3 (3)    |
| Br3—Pb1—Br1                              | 89.01 (5)   | Br2 <sup>ii</sup> —Pb1—Br2 <sup>iv</sup>  | 12.71 (13)  |
| Br3—Pb1—Br1 <sup>i</sup>                 | 89.45 (5)   | Br2 <sup>ii</sup> —Pb1—Br2                | 96.5 (3)    |
| Br3—Pb1—Br3 <sup>ii</sup>                | 92.20 (8)   | Pb1 <sup>v</sup> —Br1—Pb1                 | 177.78 (8)  |
| Br3—Pb1—Br2 <sup>iii</sup>               | 94.85 (17)  | Pb1—Br2—Pb1 <sup>iii</sup>                | 167.29 (13) |
| <b>Phase II, 295 K</b>                   |             |                                           |             |
| Pb1—Cl1                                  | 2.8911 (19) | Pb1—Cl3 <sup>v</sup>                      | 3.151 (2)   |
| Pb1—Cl2                                  | 2.7113 (18) | Pb1—Cl4                                   | 2.8625 (18) |
| Pb1—Cl3                                  | 2.852 (2)   | Pb1—Cl4 <sup>vi</sup>                     | 2.8882 (18) |
| Cl1—Pb1—Cl3 <sup>v</sup>                 | 94.48 (6)   | Cl3—Pb1—Cl4                               | 93.19 (7)   |
| Cl2—Pb1—Cl1                              | 90.33 (6)   | Cl3—Pb1—Cl4 <sup>vi</sup>                 | 93.58 (7)   |
| Cl2—Pb1—Cl3                              | 87.21 (7)   | Cl4—Pb1—Cl1                               | 84.85 (7)   |
| Cl2—Pb1—Cl3 <sup>v</sup>                 | 175.12 (6)  | Cl4 <sup>vi</sup> —Pb1—Cl1                | 87.94 (7)   |
| Cl2—Pb1—Cl4                              | 84.61 (6)   | Cl4 <sup>vi</sup> —Pb1—Cl3 <sup>v</sup>   | 95.67 (6)   |
| Cl2—Pb1—Cl4 <sup>vi</sup>                | 85.30 (6)   | Cl4—Pb1—Cl3 <sup>v</sup>                  | 95.00 (6)   |
| Cl3—Pb1—Cl1                              | 176.98 (6)  | Cl4—Pb1—Cl4 <sup>vi</sup>                 | 167.55 (9)  |

|                           |             |                                         |             |
|---------------------------|-------------|-----------------------------------------|-------------|
| Cl3—Pb1—Cl3 <sup>v</sup>  | 87.96 (2)   | Pb1—Cl4—Pb1 <sup>i</sup>                | 167.55 (9)  |
| <b>Phase II, 100 K</b>    |             |                                         |             |
| Pb1—Cl1                   | 2.8860 (14) | Pb1—Cl3                                 | 2.8355 (15) |
| Pb1—Cl2                   | 2.6755 (15) | Pb1—Cl4 <sup>vi</sup>                   | 2.9552 (14) |
| Pb1—Cl3 <sup>v</sup>      | 3.1971 (16) | Pb1—Cl4                                 | 2.7881 (14) |
| Cl1—Pb1—Cl3 <sup>v</sup>  | 93.55 (4)   | Cl3—Pb1—Cl4 <sup>vi</sup>               | 101.62 (4)  |
| Cl1—Pb1—Cl4 <sup>vi</sup> | 83.40 (4)   | Cl4—Pb1—Cl1                             | 83.00 (4)   |
| Cl2—Pb1—Cl1               | 90.01 (4)   | Cl4—Pb1—Cl3 <sup>v</sup>                | 91.79 (4)   |
| Cl2—Pb1—Cl3               | 86.53 (5)   | Cl4—Pb1—Cl3                             | 91.13 (4)   |
| Cl2—Pb1—Cl3 <sup>v</sup>  | 174.21 (4)  | Cl4 <sup>vi</sup> —Pb1—Cl3 <sup>v</sup> | 102.15 (4)  |
| Cl2—Pb1—Cl4               | 84.11 (5)   | Cl4—Pb1—Cl4 <sup>vi</sup>               | 161.07 (7)  |
| Cl2—Pb1—Cl4 <sup>vi</sup> | 82.78 (4)   | Pb1—Cl3—Pb1 <sup>vii</sup>              | 143.48 (6)  |
| Cl3—Pb1—Cl1               | 173.47 (4)  | Pb1—Cl4—Pb1 <sup>i</sup>                | 161.07 (7)  |
| Cl3—Pb1—Cl3 <sup>v</sup>  | 89.48 (2)   |                                         |             |

Symmetry code(s): (i)  $x-1, y, z$ ; (ii)  $-x, y, -z+1/2$ ; (iii)  $x, -y+1, z-1/2$ ; (iv)  $-x, -y+1, -z+1$ ; (v)  $x, -y+1/2, z+1/2$ ; (vi)  $x+1, y, z$ ; (vii)  $x, -y+1/2, z-1/2$ .

**Table S5.** Selected hydrogen-bond parameters of IMPB in phase **II** at 295 K and 100 K. The N—H $\cdots$ X HBs for MHy<sup>+</sup> are marked in red.

| $D-H\cdots A$                      | $D-H$ (Å) | $H\cdots A$ (Å) | $D\cdots A$ (Å) | $D-H\cdots A$ (°) |
|------------------------------------|-----------|-----------------|-----------------|-------------------|
| <b>Phase II, 295 K</b>             |           |                 |                 |                   |
| N4—H4 $\cdots$ Br2 <sup>i</sup>    | 0.86      | 2.84            | 3.506 (18)      | 135.2             |
| C3—H3 $\cdots$ Br1 <sup>ii</sup>   | 0.93      | 2.70            | 3.604 (18)      | 164.8             |
| N1—H1 $\cdots$ N6                  | 0.86      | 1.99            | 2.84 (3)        | 174.4             |
| C2—H2 $\cdots$ Br1 <sup>iii</sup>  | 0.93      | 2.91            | 3.74 (2)        | 149.1             |
| C5—H5 $\cdots$ Br2 <sup>iv</sup>   | 0.93      | 2.92            | 3.67 (2)        | 138.2             |
| <b>Phase II, 100 K</b>             |           |                 |                 |                   |
| N4—H4 $\cdots$ Br2 <sup>i</sup>    | 0.88      | 2.69            | 3.356 (9)       | 133.4             |
| N4—H4 $\cdots$ Br4 <sup>i</sup>    | 0.88      | 2.83            | 3.503 (9)       | 134.5             |
| C3—H3 $\cdots$ Br1 <sup>ii</sup>   | 0.95      | 2.83            | 3.766 (11)      | 168.2             |
| N1—H1 $\cdots$ N6                  | 0.88      | 2.03            | 2.904 (12)      | 174.7             |
| C2—H2 $\cdots$ Br1 <sup>iii</sup>  | 0.95      | 2.91            | 3.746 (11)      | 147.6             |
| C5—H5 $\cdots$ Br2 <sup>iv</sup>   | 0.95      | 2.82            | 3.597 (11)      | 139.9             |
| N6—H6A $\cdots$ Br4                | 0.88      | 2.88            | 3.585 (10)      | 137.6             |
| N7—H7A $\cdots$ Br1 <sup>v</sup>   | 0.91      | 2.80            | 3.475 (11)      | 132.1             |
| N7—H7A $\cdots$ Br4 <sup>iii</sup> | 0.91      | 2.81            | 3.449 (10)      | 128.7             |
| N7—H7B $\cdots$ Br1 <sup>iii</sup> | 0.91      | 2.51            | 3.345 (9)       | 153.1             |

Symmetry code(s): (i)  $-x, -y, -z+1$ ; (ii)  $-x+1, -y, -z+1$ ; (iii)  $x, y, z-1$ ; (iv)  $x-1, y, z$ ; (v)  $x-1, y, z-1$ .

**Table S6.** Selected hydrogen-bond parameters of IMPC in phase **II** at 295 K and 100 K. The N—H $\cdots$ X HBs for MHy<sup>+</sup> are marked in red.

| <i>D</i> —H $\cdots$ <i>A</i>     | <i>D</i> —H (Å) | H $\cdots$ <i>A</i> (Å) | <i>D</i> $\cdots$ <i>A</i> (Å) | <i>D</i> —H $\cdots$ <i>A</i> (°) |
|-----------------------------------|-----------------|-------------------------|--------------------------------|-----------------------------------|
| <b>Phase II, 295 K</b>            |                 |                         |                                |                                   |
| N4—H4 $\cdots$ Cl2 <sup>i</sup>   | 0.86            | 2.68                    | 3.348 (8)                      | 134.9                             |
| N4—H4 $\cdots$ Cl4 <sup>i</sup>   | 0.86            | 2.81                    | 3.491 (8)                      | 137.0                             |
| C3—H3 $\cdots$ Cl1 <sup>ii</sup>  | 0.93            | 2.62                    | 3.534 (9)                      | 168.5                             |
| N1—H1 $\cdots$ N6                 | 0.86            | 1.99                    | 2.840 (11)                     | 169.9                             |
| <b>Phase II, 100 K</b>            |                 |                         |                                |                                   |
| C4—H4 $\cdots$ Cl2 <sup>iii</sup> | 0.95            | 2.77                    | 3.499 (7)                      | 134.5                             |
| N3—H3 $\cdots$ Cl2 <sup>i</sup>   | 0.88            | 2.57                    | 3.233 (5)                      | 132.6                             |
| N3—H3 $\cdots$ Cl4 <sup>i</sup>   | 0.88            | 2.64                    | 3.335 (6)                      | 137.0                             |
| N1—H1 $\cdots$ N6                 | 0.88            | 1.98                    | 2.857 (8)                      | 173.8                             |
| C2—H2 $\cdots$ Cl1 <sup>ii</sup>  | 0.95            | 2.68                    | 3.620 (7)                      | 169.1                             |
| C5—H5 $\cdots$ Cl1 <sup>iv</sup>  | 0.95            | 2.81                    | 3.642 (7)                      | 147.3                             |
| N6—H6A $\cdots$ Cl4               | 0.86            | 2.82                    | 3.447 (5)                      | 131.5                             |
| N7—H7A $\cdots$ Cl1 <sup>v</sup>  | 0.91            | 2.55                    | 3.252 (7)                      | 134.9                             |
| N7—H7A $\cdots$ Cl4 <sup>iv</sup> | 0.91            | 2.70                    | 3.292 (6)                      | 123.3                             |
| N7—H7B $\cdots$ Cl1 <sup>iv</sup> | 0.91            | 2.34                    | 3.192 (6)                      | 156.8                             |

Symmetry code(s): (i)  $-x, -y, -z+1$ ; (ii)  $-x+1, -y, -z+1$ ; (iii)  $x-1, y, z$ ; (iv)  $x, y, z-1$ ; (v)  $x-1, y, z-1$ .

**Table S7.** Comparison of selected geometric parameters between IMPB, IMPC and analogous examples of (110)-oriented layered perovskites found in the literature.

| Compound                                              | symm.                                           | T (K) | $\Delta d \times 10^{-4}$ | $\sigma^2$ (deg <sup>2</sup> ) | $\theta_{\text{link}}$ (°) | $d_{\text{intra}}$ (Å) | Ref.      |
|-------------------------------------------------------|-------------------------------------------------|-------|---------------------------|--------------------------------|----------------------------|------------------------|-----------|
| <b>IMMHyPbBr<sub>4</sub></b>                          | <i>P2/c</i>                                     | 358   | 8.3                       | 13.7                           | 167.3(4)                   | 8.51                   | This      |
| <b>(IMPB)</b>                                         | <i>P2<sub>1</sub>/c</i>                         | 100   | 13.5                      | 28.7                           | <b>147.51(6)</b>           | <b>8.16</b>            | work      |
| <b>IMMHyPbCl<sub>4</sub></b>                          | <i>P2/c</i>                                     | 390   | 10.5                      | 15.1                           | 167.0(8)                   | 8.19                   |           |
| <b>(IMPC)</b>                                         | <i>P2<sub>1</sub>/c</i>                         | 100   | 31.5                      | 44.7                           | <b>143.48(6)</b>           | <b>7.95</b>            |           |
| FA <sub>1.5</sub> AA <sub>0.5</sub> PbBr <sub>4</sub> | <i>P2<sub>1</sub>/c</i>                         | 93    | 6.2                       | 20.7                           | 169.20(6)                  | 8.65                   | <b>1</b>  |
| TzGUAPbBr <sub>4</sub>                                | <i>P2<sub>1</sub>/c</i>                         | 93    | 11.0                      | 28.2                           | 169.58(3)                  | 8.61                   | <b>2</b>  |
| IMTzPbBr <sub>4</sub>                                 | <i>Pbcm</i>                                     | 298   | 11.7                      | 26.6                           | 171.41(2)                  | 9.46*                  | <b>3</b>  |
| FAHEAPbBr <sub>4</sub>                                | <i>P2/n</i>                                     | 150   | 13.7                      | 14.8                           | 177.96(4)                  | 8.55                   | <b>4</b>  |
| PYTzPbBr <sub>4</sub>                                 | <i>Pmc2<sub>1</sub></i>                         | 173   | 10.2                      | 6.5                            | 179.2(3)                   | 9.36                   | <b>1</b>  |
| PYGUAPbBr <sub>4</sub>                                | <i>P-1</i>                                      | 173   | 10.6                      | 14.9                           | 180                        | 9.15                   | <b>1</b>  |
| IMGUAPbBr <sub>4</sub>                                | <i>P1</i>                                       | 93    | 7.4                       | 16.2                           | 180                        | 9.33                   | <b>2</b>  |
| <i>N</i> -MEDAPbBr <sub>4</sub>                       | <i>P2<sub>1</sub>2<sub>1</sub>2<sub>1</sub></i> | 100   | 7.6                       | 24.5                           | 151.71(4)                  | 8.39                   | <b>5</b>  |
| EDBEPbBr <sub>4</sub>                                 | <i>P2<sub>1</sub>/c</i>                         | 100   | 24.0                      | 24                             | 156.57(2)                  | 8.89                   | <b>6</b>  |
| MlaPbBr <sub>4</sub>                                  | <i>P2<sub>1</sub>/c</i>                         | 298   | 17.6                      | 114.8                          | 159.85(3)                  | 10.21                  | <b>7</b>  |
| EPZPbBr <sub>4</sub>                                  | <i>Pc</i>                                       | 293   | 77.4                      | 46.1                           | 160.0(3)                   | 9.29                   | <b>8</b>  |
| APIPbBr <sub>4</sub>                                  | <i>P2<sub>1</sub>/c</i>                         | 293   | 26.0                      | 20.8                           | 162.68(4)                  | 8.45                   | <b>9</b>  |
| AA <sub>2</sub> PbBr <sub>4</sub>                     | <i>P2<sub>1</sub>/c</i>                         | 173   | 30.5                      | 26.1                           | 164.97(2)                  | 9.28                   | <b>3</b>  |
| 3APRPbBr <sub>4</sub>                                 | <i>P2<sub>1</sub>/c</i>                         | 250   | 35.2                      | 43.6                           | 171.20(3)                  | 9.69                   | <b>10</b> |
| <i>m</i> -FA <sub>2</sub> PbBr <sub>4</sub> **        | <i>P2<sub>1</sub>/c</i>                         | 100   | 21.4                      | 70.3                           | 172.94(3)                  | 7.98                   | <b>11</b> |
| <i>t</i> -FA <sub>2</sub> PbBr <sub>4</sub>           | <i>P-1</i>                                      | 100   | 4.8                       | 31.2                           | 177.3(1)                   | 8.56                   | <b>11</b> |
| TMEDA <sub>0.5</sub> DMAPbCl <sub>4</sub>             | <i>P2<sub>1</sub>/c</i>                         | 296   | 22.7                      | 43.7                           | 165.12(5)                  | 8.89                   | <b>12</b> |
| APIPbCl <sub>4</sub>                                  | <i>P2<sub>1</sub>/c</i>                         | 298   | 13.7                      | 16.7                           | 167.70(9)                  | 8.80                   | <b>13</b> |
| 3APRPbCl <sub>4</sub>                                 | <i>P2<sub>1</sub>/c</i>                         | 298   | 12.3                      | 34.5                           | 169.7(1)                   | 8.98                   | <b>10</b> |
| PPZPbCl <sub>4</sub>                                  | <i>P2<sub>1</sub>/c</i>                         | 293   | 2.1                       | 32.2                           | 174.10(1)                  | 9.06                   | <b>14</b> |

$\Delta d$  – bond length distortion,  $\sigma^2$  – octahedral bond angle variance,  $\theta_{\text{link}}$  – Pb–X–Pb angles for the linking ‘X’ halogen,  $d_{\text{intra}}$  – distances between corresponding Pb atoms inside the octahedra layer, measured along [001] direction. In case of coexistence of inequivalent octahedra in one phase, larger  $\Delta d$  and  $\sigma^2$ , and smaller  $\theta_{\text{link}}$  and  $d_{\text{intra}}$  values are provided in the table.

\* – structure with 3x3 corrugation type of octahedra layers, distances between the middle Pb atoms were calculated.

\*\* – *m*- and *t*- denote monoclinic and triclinic phase of FA<sub>2</sub>PbBr<sub>4</sub>.



IM = imidazolium, MHy = methylhydrazinium, FA = formamidinium, AA = acetamidinium, Tz = 1,2,4-triazolium, GUA = guanidinium, HEA = hydroxyethylammonium, PY = pyrazolium, *N*-MEDA = *N*-methylethane-1,2-diammonium, EDBE = 2,2'-(ethylenedioxy)bis(ethylammonium), Mla = melammonium, EPZ = 1-ethylpiperazine, API = *N*-(3-aminopropyl)imidazolium, 3APR = 3-aminopyrrolidinium, TMEDA = *N,N,N',N'*-tetramethylethylenediammonium, DMA = dimethylammonium, PPZ = piperazinium.

## References to Table S7

- 1 Y. Y. Guo, C. Elliott, J. A. McNulty, D. B. Cordes, A. M. Z. Slawin and P. Lightfoot, *Eur. J. Inorg. Chem.*, 2021, 3404–3411.
- 2 Y. Y. Guo, J. A. McNulty, N. A. Mica, I. D. W. Samuel, A. M. Z. Slawin, M. Bühl and P. Lightfoot, *Chem. Commun.*, 2019, **55**, 9935–9938.
- 3 Y. Y. Guo, L. J. Yang, S. Biberger, J. A. McNulty, T. Li, K. Schötz, F. Panzer and P. Lightfoot, *Inorg. Chem.*, 2020, **59**, 12858–12866.
- 4 M. B. H. Salah, N. Mercier, M. Allain, N. Zouari, U. Giovanella and C. Botta, *Eur. J. Inorg. Chem.*, 2019, 4527–4531.
- 5 E. R. Dohner, E. T. Hoke and H. I. Karunadasa, *J. Am. Chem. Soc.*, 2014, **136**, 1718–1721.
- 6 E. R. Dohner, A. Jaffe, L. R. Bradshaw and H. I. Karunadasa, *J. Am. Chem. Soc.*, 2014, **136**, 13154–13157.
- 7 W. Huang, X. Zhang, Y. Li, Y. Zhou, X. Chen, X. Li, F. Wu, M. Hong, J. Luo, S. Zhao, W. Huang, Y. Li, Y. Zhou, X. Chen, X. Li, F. Wu, M. Hong, J. Luo, S. Zhao and X. Zhang, *Angew. Chemie Int. Ed.*, 2022, **61**, e202202746.
- 8 L. Mao, P. Guo, M. Kepenekian, I. Hadar, C. Katan, J. Even, R. D. Schaller, C. C. Stoumpos and M. G. Kanatzidis, *J. Am. Chem. Soc.*, 2018, **140**, 13078–13088.
- 9 Y. Y. Li, C. K. Lin, G. L. Zheng, Z. Y. Cheng, H. You, W. D. Wang and J. Lin, *Chem. Mater.*, 2006, **18**, 3463–3469.
- 10 X. Li, P. Guo, M. Kepenekian, I. Hadar, C. Katan, J. Even, C. C. Stoumpos, R. D. Schaller and M. G. Kanatzidis, *Chem. Mater.*, 2019, **31**, 3582–3590.
- 11 S. A. Fateev, A. A. Petrov, E. I. Marchenko, Y. V. Zubavichus, V. N. Khrustalev, A. V. Petrov, S. M. Aksenov, E. A. Goodilin and A. B. Tarasov, *Chem. Mater.*, 2021, **33**, 1900–1907.
- 12 Y. Y. Ma, H. M. Pan, D. Y. Li, S. Wu and Z. Jing, *Zeitschrift für Anorg. und Allg. Chemie*, 2022, **648**, e202100334.
- 13 Z. Wu, C. Ji, Z. Sun, S. Wang, S. Zhao, W. Zhang, L. Li and J. Luo, *J. Mater. Chem. C*, 2018, **6**, 1171–1175.
- 14 A. Bonamartini Corradi, A. M. Ferrari, L. Righi and P. Sgarabotto, *Inorg. Chem.*, 2001, **40**, 218–223.

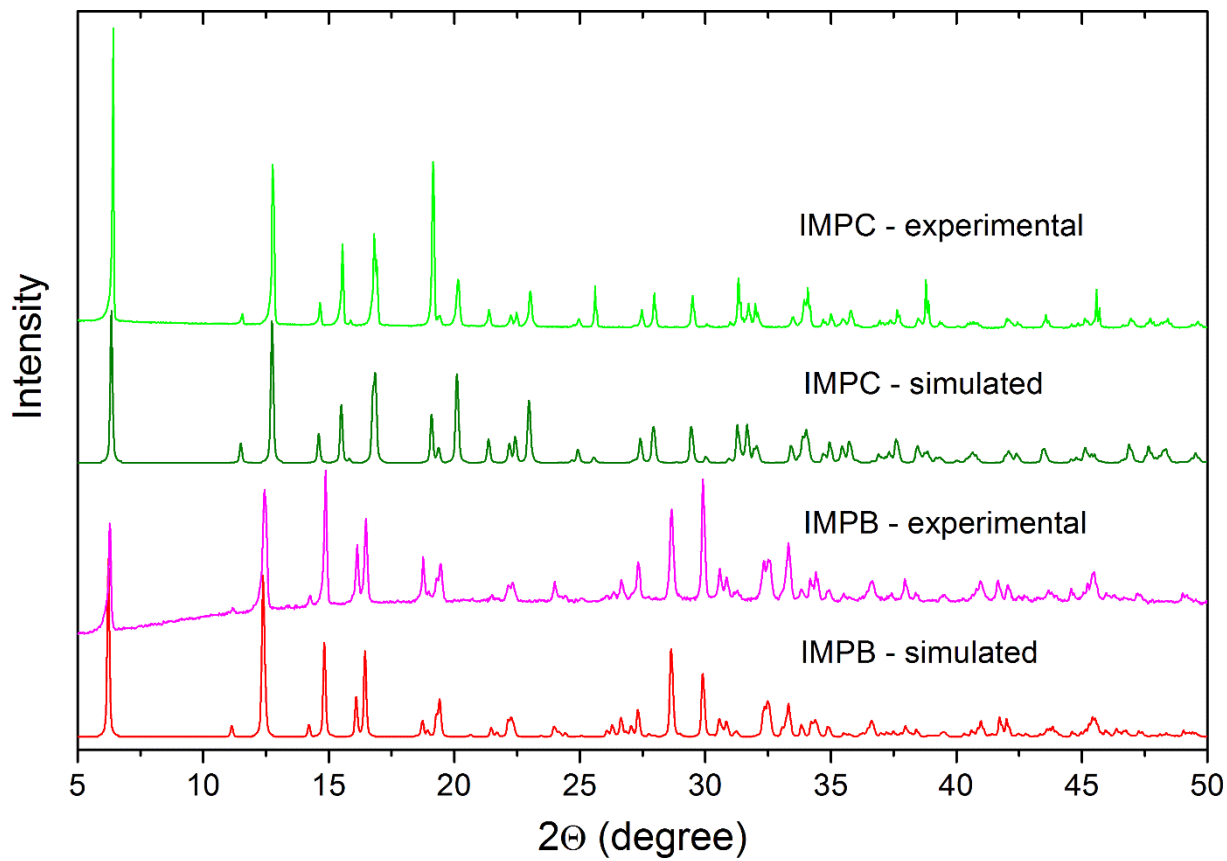

**Figure S1.** RT X-ray diffraction patterns for the obtained samples together with the calculated ones based on the RT single crystal data.

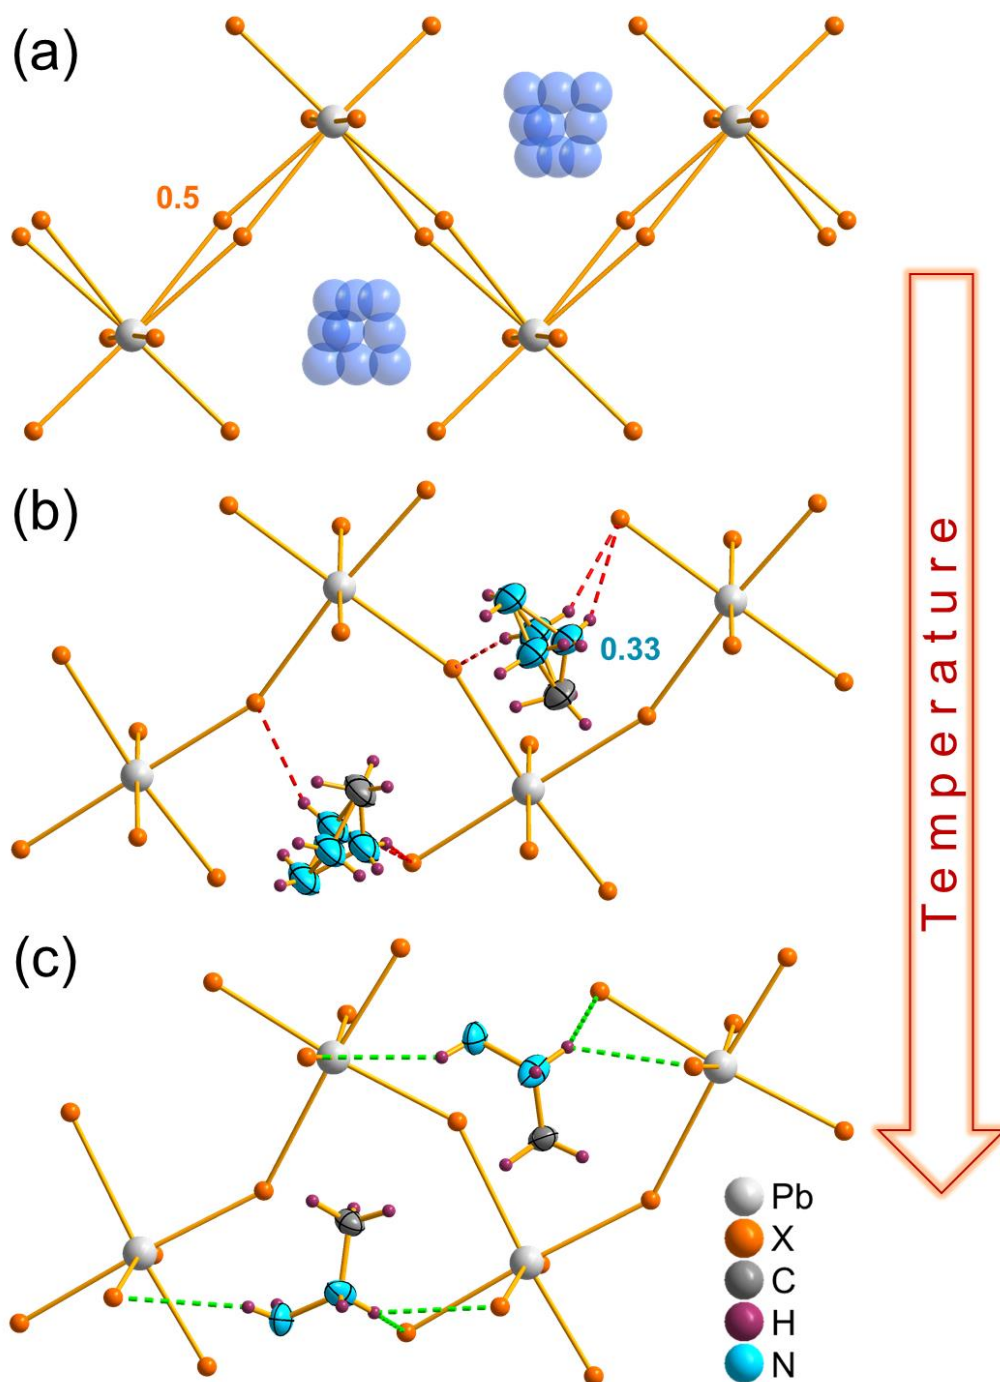

**Figure S2.** Changes in geometry of single layer of  $[\text{PbX}_6]_\infty$  octahedra ( $\text{X} = \text{Br}, \text{Cl}$ ) and dynamics of intra-layer  $\text{MHy}^+$  cation in: (a) phase I ( $P2/c$ ) with the linking halide split into two symmetrically equivalent positions with equal occupancy and heavily disordered  $\text{MHy}^+$ , (b) phase II ( $P2_1/c$ ) at 295 K with ordered halides and still disordered the middle N atom of  $\text{MHy}^+$  which is split into three symmetrically inequivalent positions with equal, 1/3 probability and (c) phase II ( $P2_1/c$ ) at 100 K with all atoms ordered. Red dashed lines in (b) denote potential hydrogen bonding between disordered N atom of  $\text{MHy}^+$  with  $\text{X}^-$  acceptors. Green dashed lines in (c) represent  $\text{N-H}\cdots\text{X}$  HBs.

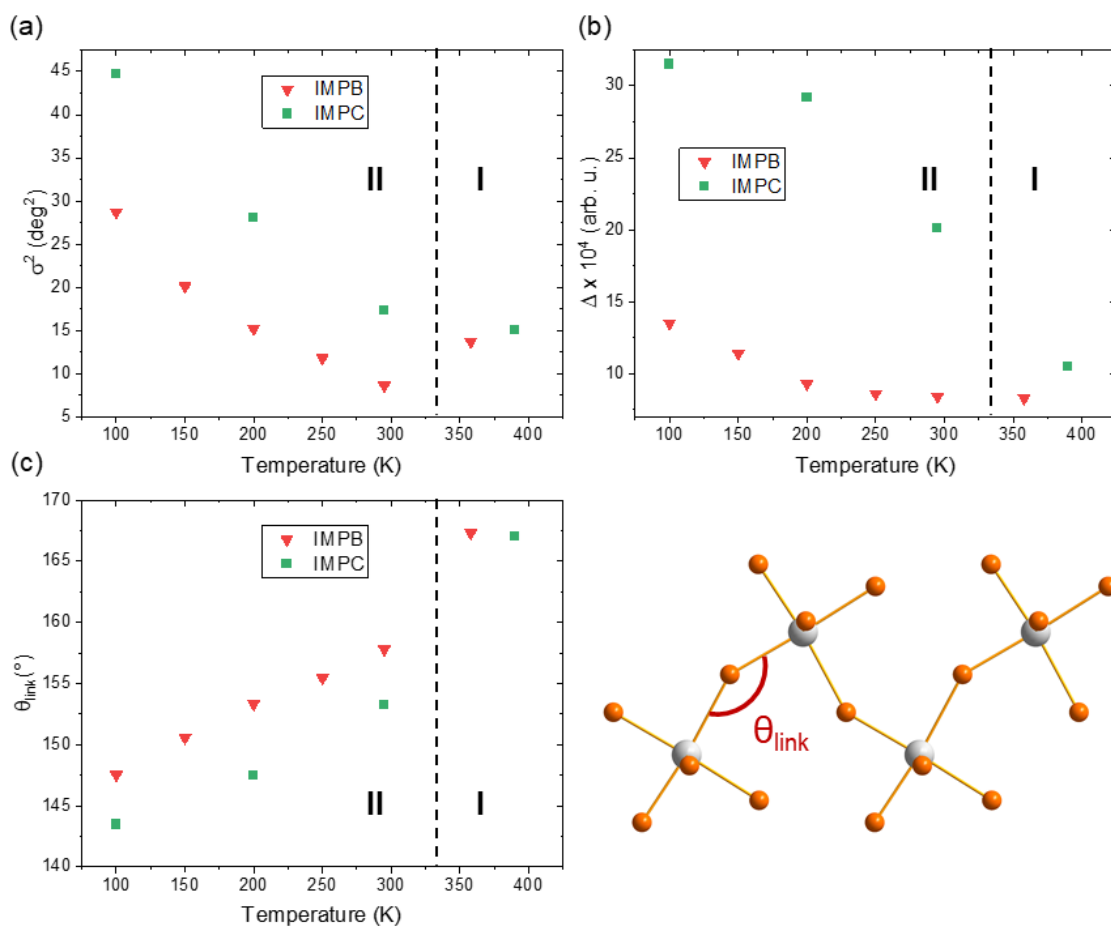

**Figure S3.** The temperature dependence of the (a, b) octahedral distortion parameters – (a) octahedral bond angle variance ( $\sigma^2$ ) and (b) bond length distortion ( $\Delta d$ ), and (c) Pb–X–Pb angles for the linking ‘X’ halogen ( $\theta_{\text{link}}$ ). **I** and **II** correspond to phase **I** ( $P2_1/c$ ) and phase **II** ( $P2/c$ ), respectively.

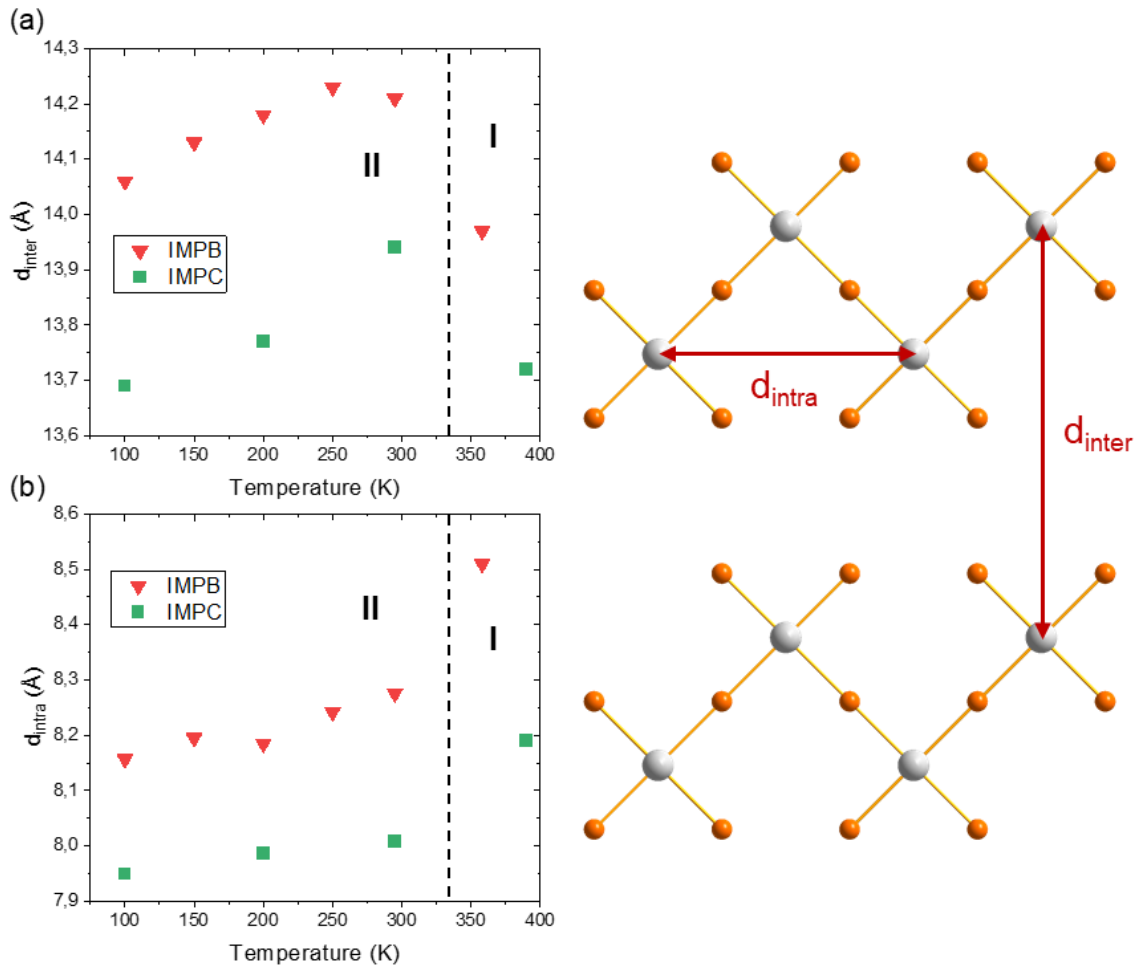

**Figure S4.** Distances between corresponding Pb atoms of (a) neighbouring layers ( $d_{\text{inter}}$ ) and (b) inside the layers measured along [001] direction ( $d_{\text{intra}}$ ) as a function of temperature. **I** and **II** correspond to phase **I** ( $P2/c$ ) and phase **II** ( $P2_1/c$ ), respectively.

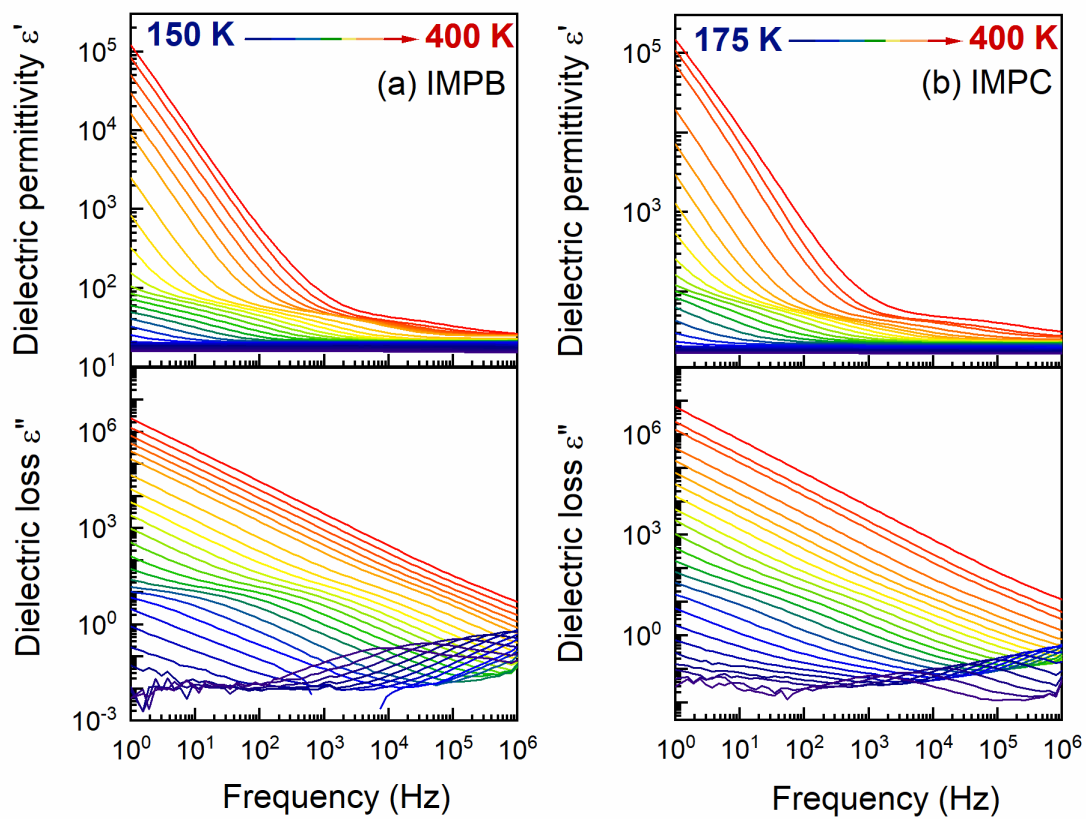

**Figure S5.** Frequency dependence of complex dielectric spectra for two samples in the temperature range from 150 (175) K to 400 K for (a) IMPB and (b) IMPC, respectively.

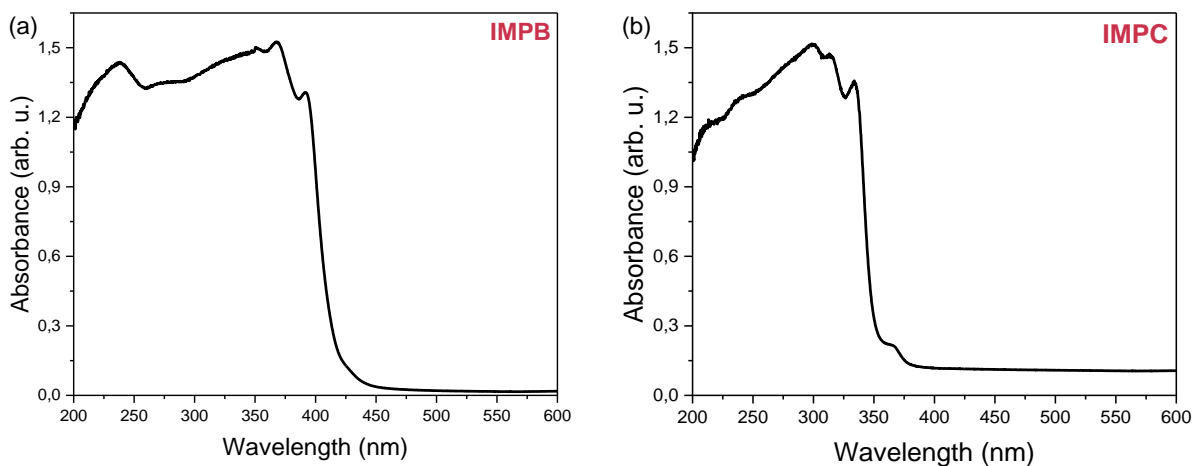

**Figure S6.** Diffuse-reflectance spectra (DRS) of (a) IMPB and (b) IMPC.

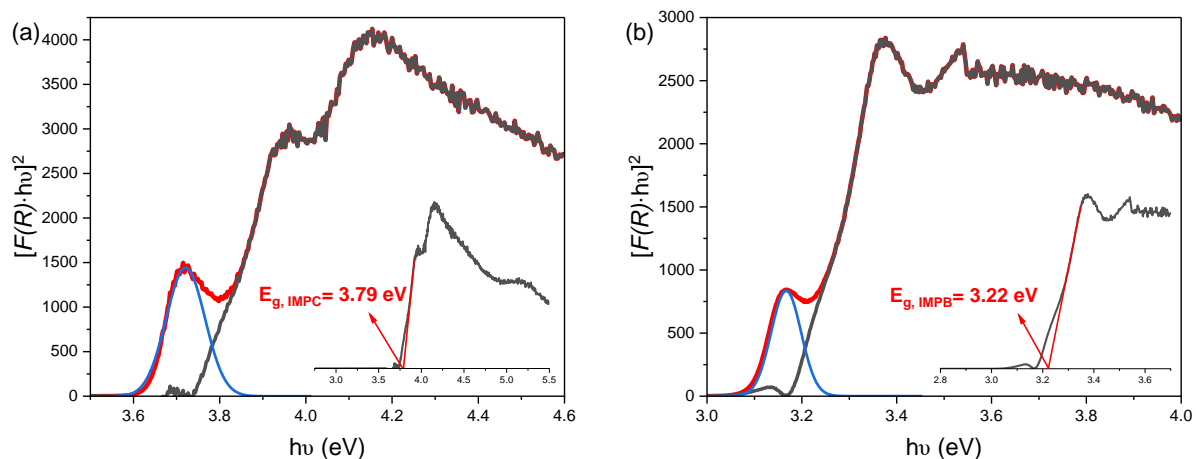

**Figure S7.** Kubelka-Munk functions (red lines) for (a) IMPB and (b) IMPC with Gauss fit of free exciton peaks (blue lines), the Kubelka-Munk functions after exciton peak subtraction (black lines) as well as band gap ( $E_g$ ) estimation with Tauc plots (inserts).

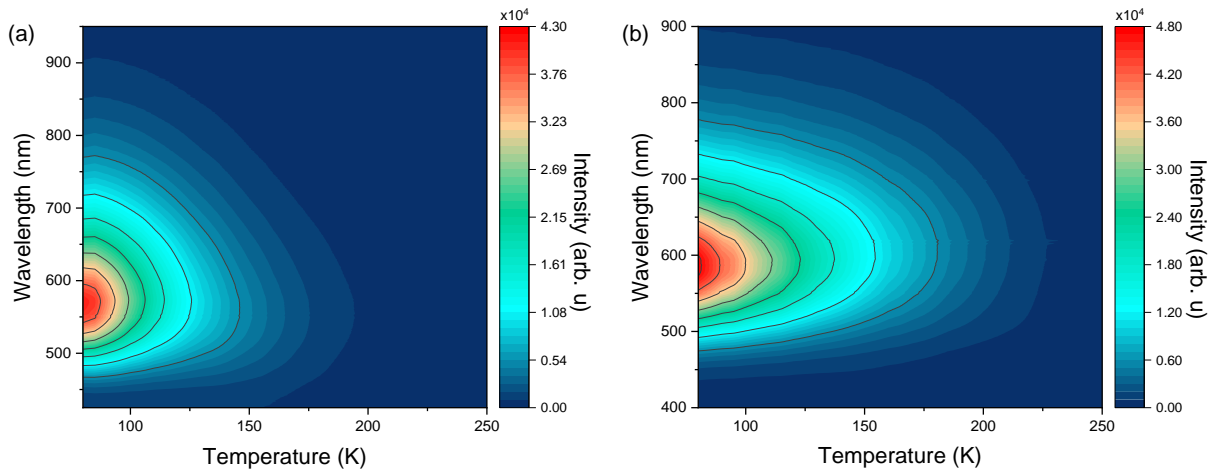

**Figure S8.** Maps of the thermal evolution of emission for: (a) IMPB and (b) IMPC.

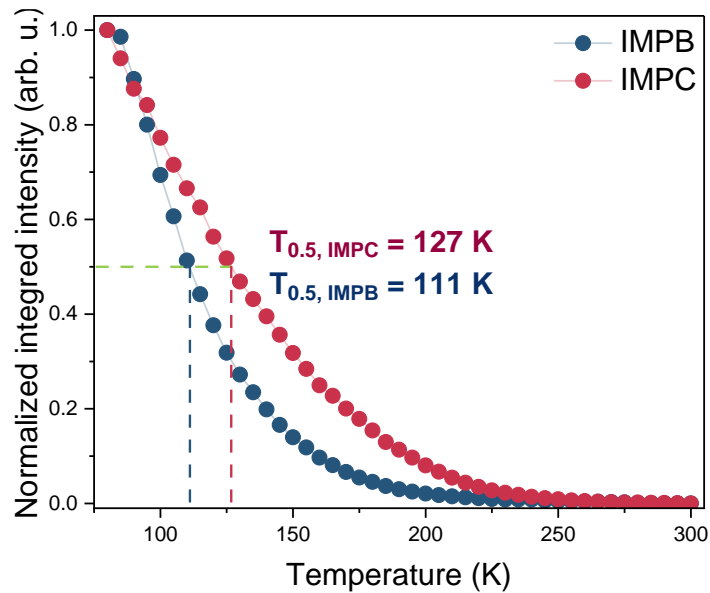

**Figure S9.** Determination of  $T_{0.5}$  parameters for IMPB and IMPC.

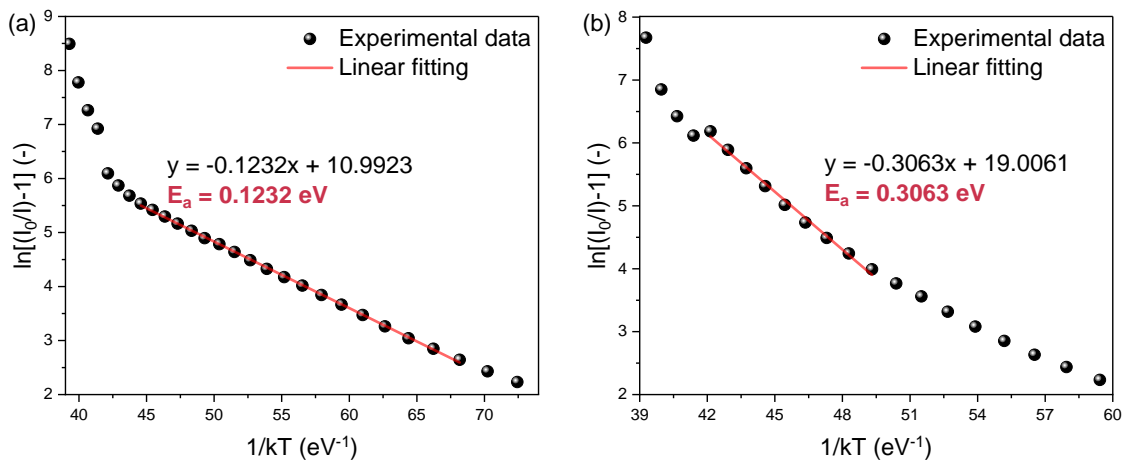

**Figure S10.** Determination of the energy activation of thermal quenching for: (a) IMPB and (b) IMPC.
